# Supplementary material
Source: PubMed Central journal article supplement (PMC7796900)

**A**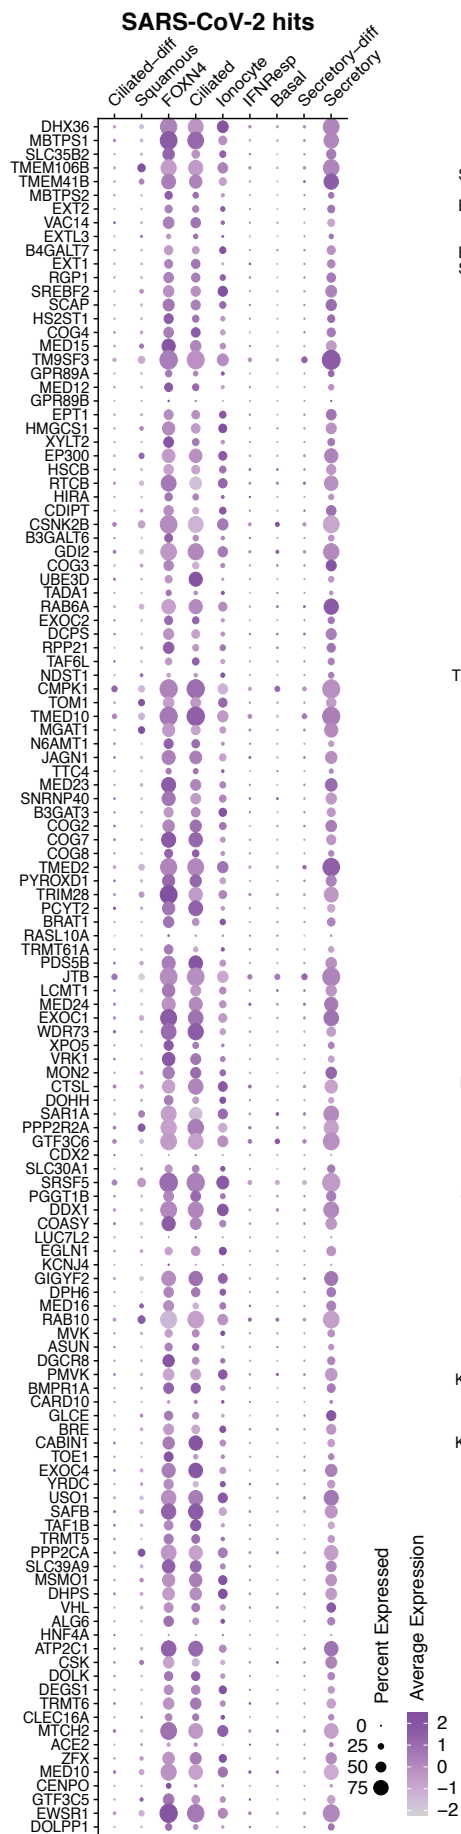**B**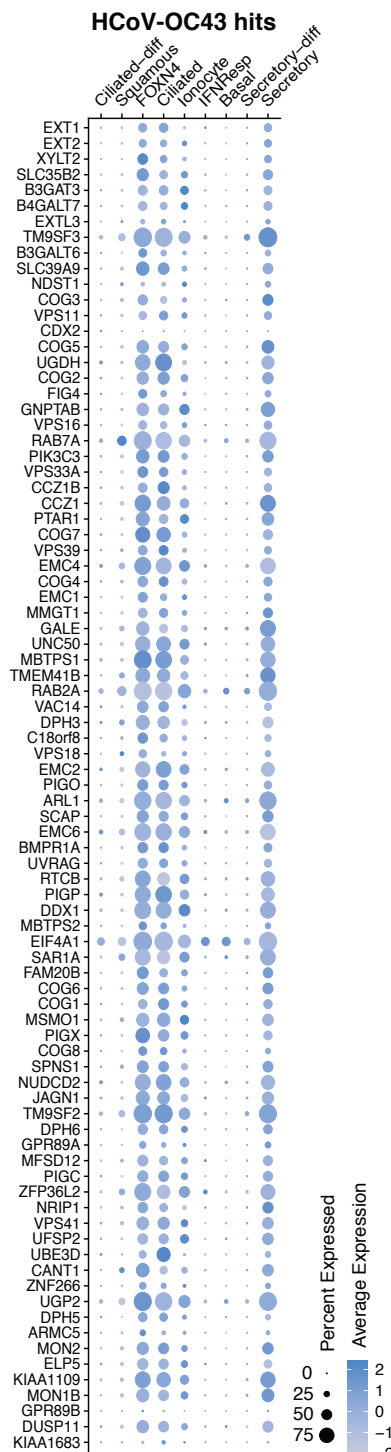**C**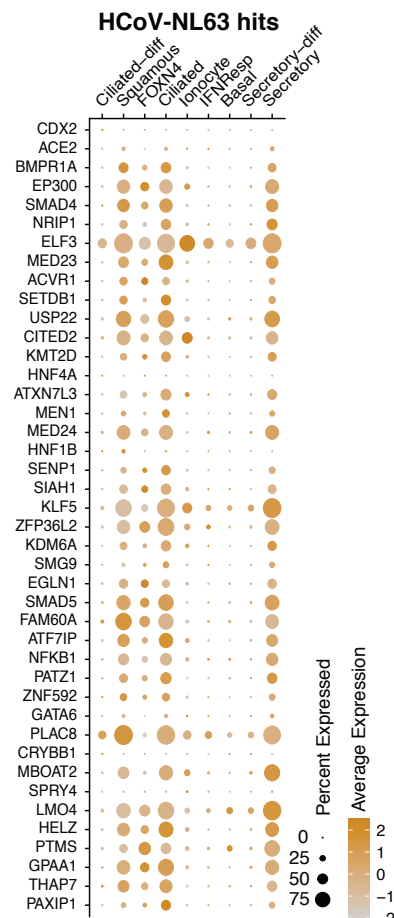**D**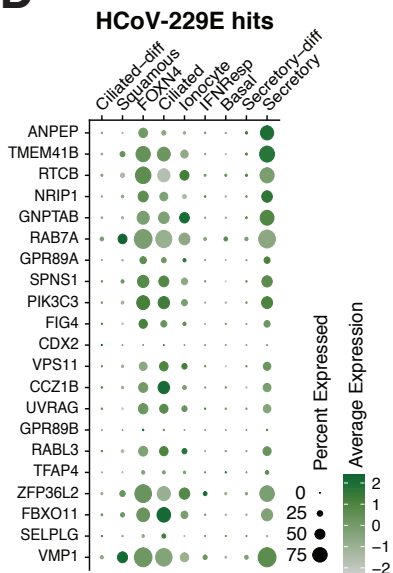

Supplement: NIHMS1653502-supplement-5.pdf [file NIHMS1653502-supplement-5.pdf]
